# Supplementary material for: Skewed epithelial cell differentiation and premature aging of the thymus in the absence of vitamin D signaling
Source: PubMed Central journal article supplement (PMC11423877; doi:10.1126/sciadv.adm9582), 2024-09-25
Supplement: sciadv.adm9582_sm.pdf [file sciadv.adm9582_sm.pdf]

Supplementary Materials for  
**Skewed epithelial cell differentiation and premature aging of the thymus in  
the absence of vitamin D signaling**

Patricio Artusa *et al.*

Corresponding author: John H. White, [john.white@mcgill.ca](mailto:john.white@mcgill.ca)

*Sci. Adv.* **10**, eadm9582 (2024)  
DOI: 10.1126/sciadv.adm9582

**This PDF file includes:**

Figs. S1 to S11  
Table S1

## Supplementary Materials:

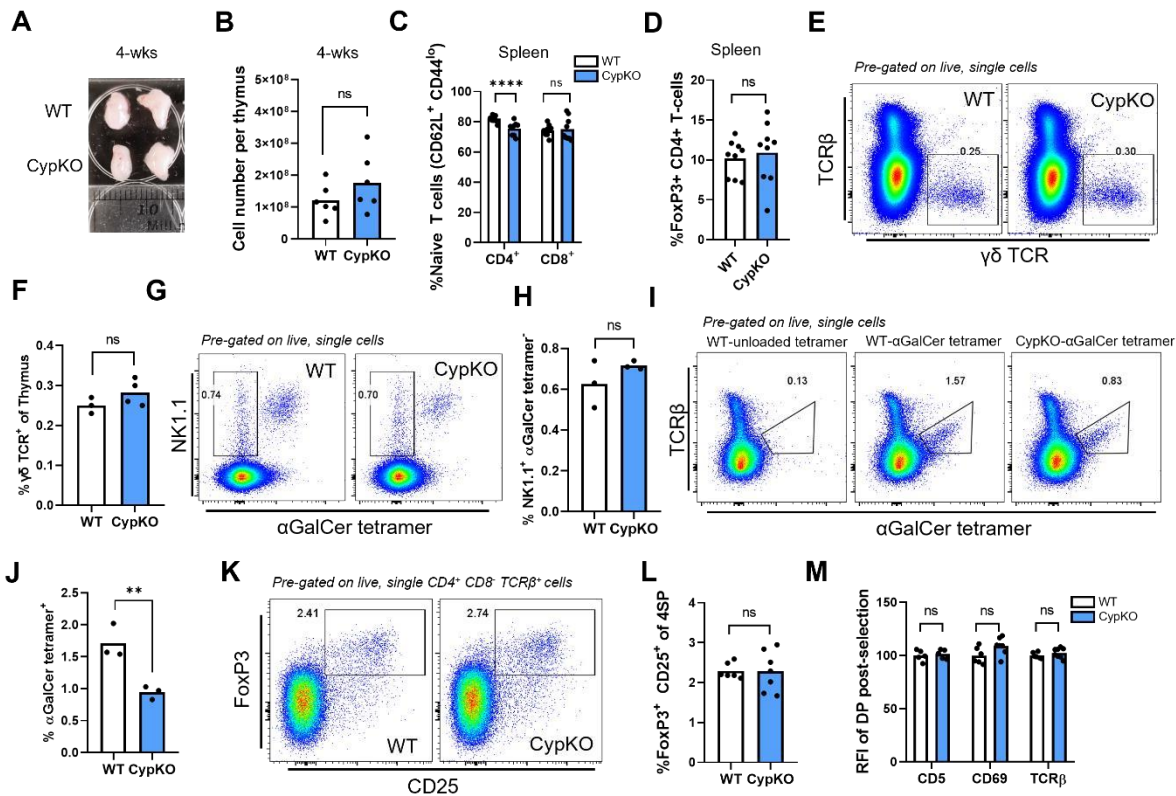

**fig S1. Altered T cell development and conventional T cell homeostasis in CypKO mice** **A**, Thymic lobes from 2 WT (top) and KO (bottom) 4-week-old mice sex-matched mice. **B**, Total thymic cell number in 4-week-old WT versus KO mice. **C**, Frequency of naïve (CD62L<sup>+</sup> CD44<sup>lo</sup>) splenic CD4<sup>+</sup> and CD8<sup>+</sup> T cells. **D**, Frequency of splenic FoxP3<sup>+</sup> regulatory T cells. **E,F**, Representative flow cytometry plots of γδ T-cells in WT vs KO mice (**E**) and summary data (**F**). **G,H**, Representative flow cytometry plots of NK cells in WT vs KO mice (**G**) and summary data (**H**). **I,H**, Representative flow cytometry plots of αGalCer tetramer<sup>+</sup> iNKT cells in WT vs KO mice (**G**) and summary data (**H**). **K,L**, Representative flow cytometry plots of regulatory T cells in WT vs KO thymi (**K**) and summary data (**L**). **M**, Relative fluorescence intensity (RFI) of TCR signaling molecules on post-selection DP thymocytes, relative to average WT expression. All experiments were performed with age-matched (male and female) 6-10-week old mice. Each dot represents an individual mouse. Statistics: Unpaired parametric T tests.  $p < 0.05^*$ ,  $p < 0.01^{**}$ ,  $p < 0.001^{***}$ ,  $p < 0.0001^{****}$ .

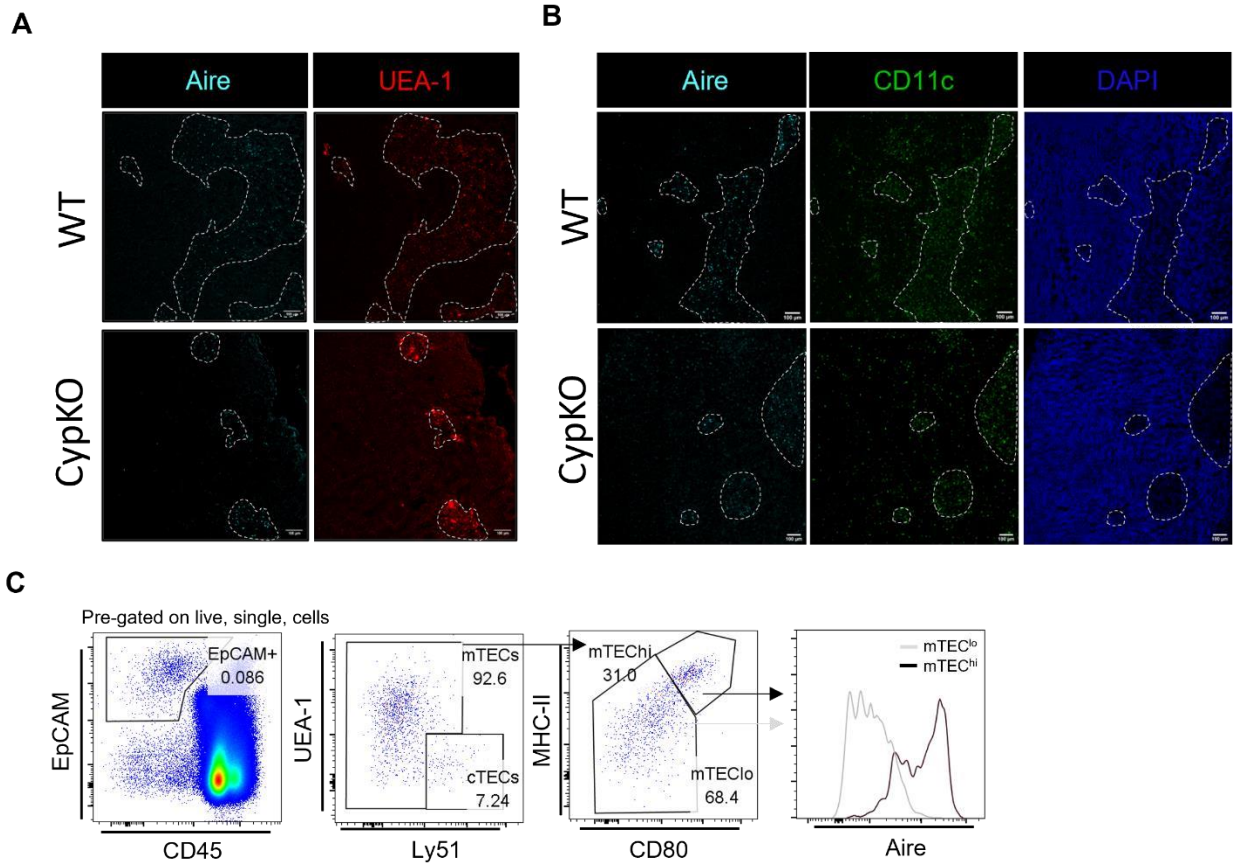

**fig S2. Defined medullary structures in CypKO thymi.** **A.** Representative IF microscopy images of Aire (in white dashed lines) and the mTEC marker, UEA-1, staining in WT and CypKO thymi. **B.** Representative IF microscopy images of Aire, CD11c, and DAPI with distinctive medullary (Aire<sup>+</sup> regions, white dashed lines) staining patterns in both WT and CypKO thymi. **C.** Flow cytometric-gating strategy for TEC populations. Experiments were performed with age-matched (male and female) 8-10-week old mice.

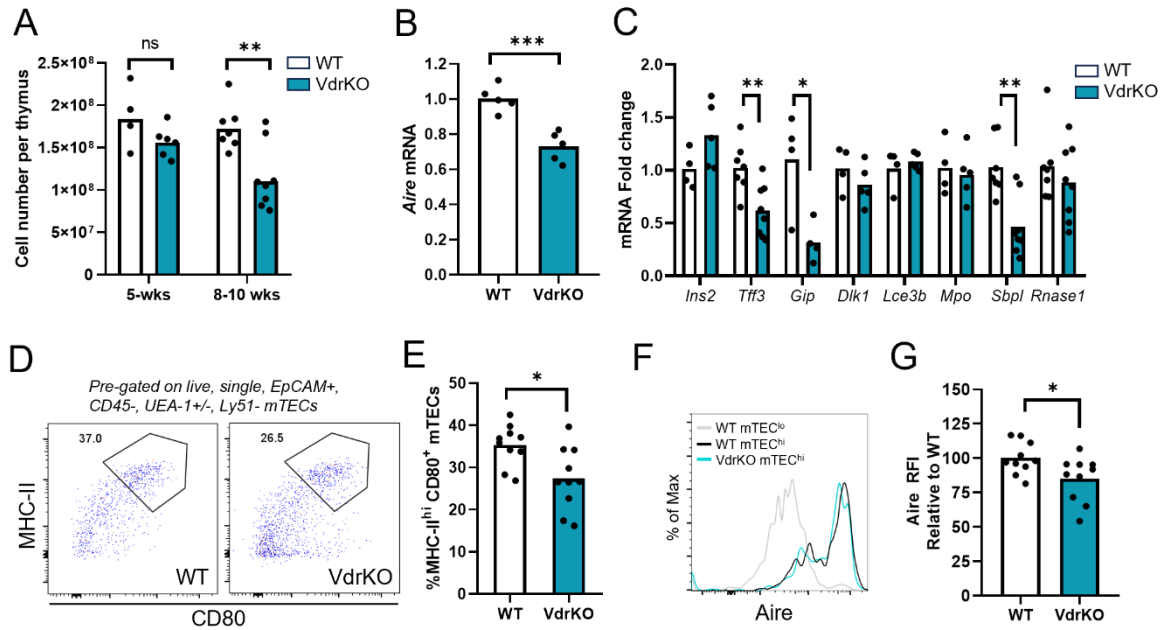

**fig. S3. Impaired Aire expression and thymic development in VdrKO mice.** **A.** Total thymic cell number in 5- or 8-9 week old WT and VdrKO littermates. **B,C.** Aire (B) and TRA (C) gene expression in WT versus VdrKO thymic samples. **D,E.** Representative flow cytometric gating of mTEC<sup>hi</sup> cells (MHC-II<sup>hi</sup> CD80<sup>+</sup>) in WT and VdrKO thymi (D) and quantification of their frequencies (E) from three independent experiments. **F,G.** Representative flow cytometry plot of Aire expression in WT and VdrKO mTEC<sup>hi</sup> cells (F), mTEC<sup>lo</sup> as staining control, and quantification from two independent experiments (G). Sex-matched (male and female) mice were used for figure A. Age- and sex-matched 8-10-week-old mice were used for figures B-G. Each dot represents an individual mouse. Statistics: Unpaired parametric T tests.  $p < 0.05$ \*,  $p < 0.01$ \*\* ,  $p < 0.001$ \*\*\*,  $p < 0.0001$ \*\*\*\*.

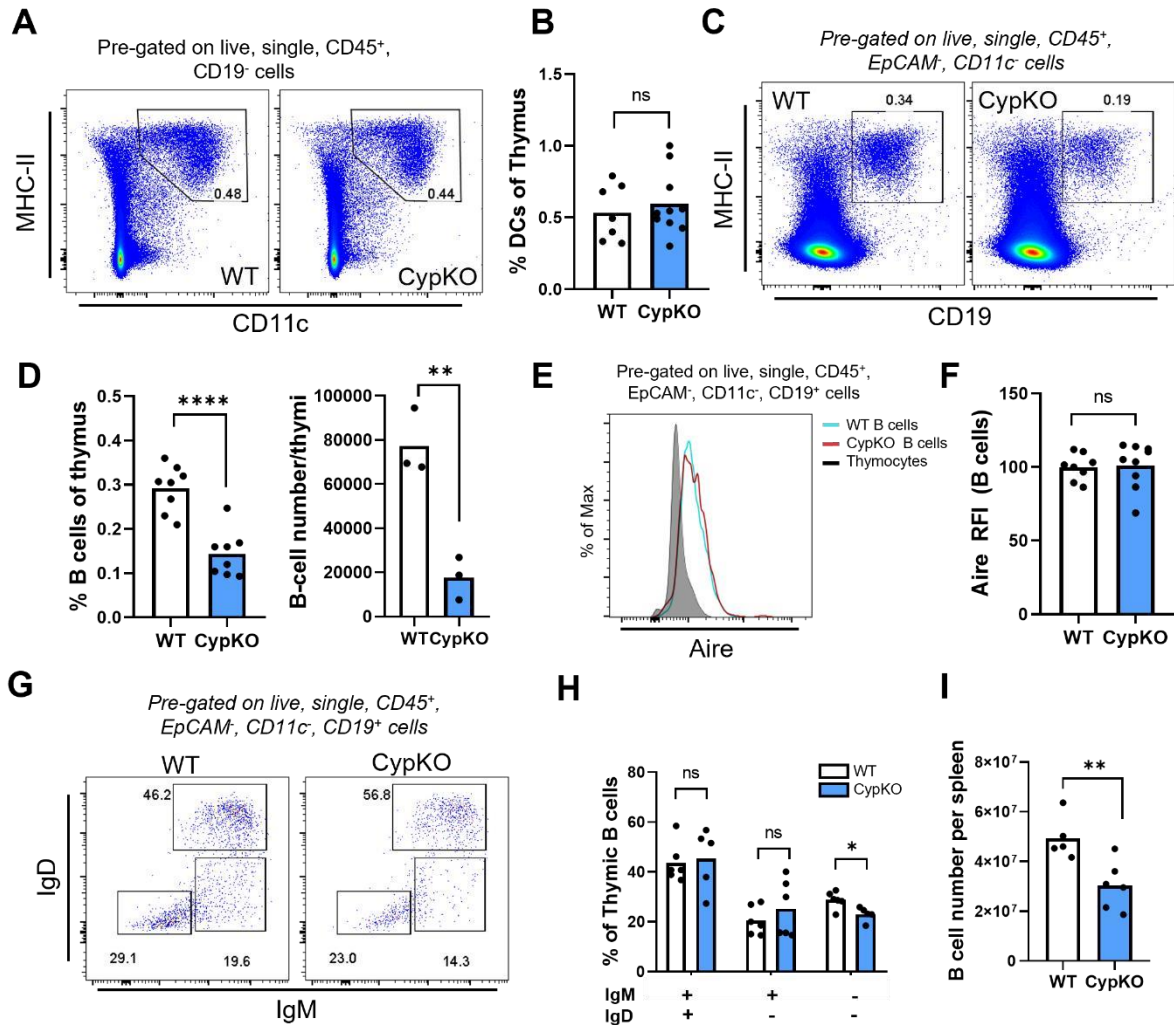

**fig S4. Systemic B cell lymphopenia in CypKO mice A,B.** Representative flow cytometry plots of dendritic cells (DCs) in WT vs KO mice (A) and summary data (B). **C,D.** Representative flow cytometry plots of B cells in WT and KO thymi (C) and summary data (D). **E,F.** Representative flow cytometry plot of Aire expression in thymic B cells (E) and quantification of the relative fluorescence intensity (relative to average of WT expression) (F). **G.** Representative flow cytometry plots of thymic B cell subsets (IgD<sup>+</sup> IgM<sup>+</sup>; “recirculating”, IgM<sup>+</sup> IgD<sup>-</sup>/IgM<sup>-</sup> IgD<sup>-</sup>; “resident”). **H.** Quantification of committed and “circulating” B cell subtypes in WT versus KO thymi. **I.** Splenic B cell (Live, single, CD19<sup>+</sup> MHC-II<sup>+</sup>) frequencies. All experiments were performed with age-matched (male and female) 6-10-week old mice. Each dot represents an individual mouse. Statistics: Unpaired parametric T tests.  $p < 0.05^*$ ,  $p < 0.01^{**}$ ,  $p < 0.001^{***}$ ,  $p < 0.0001^{****}$ .

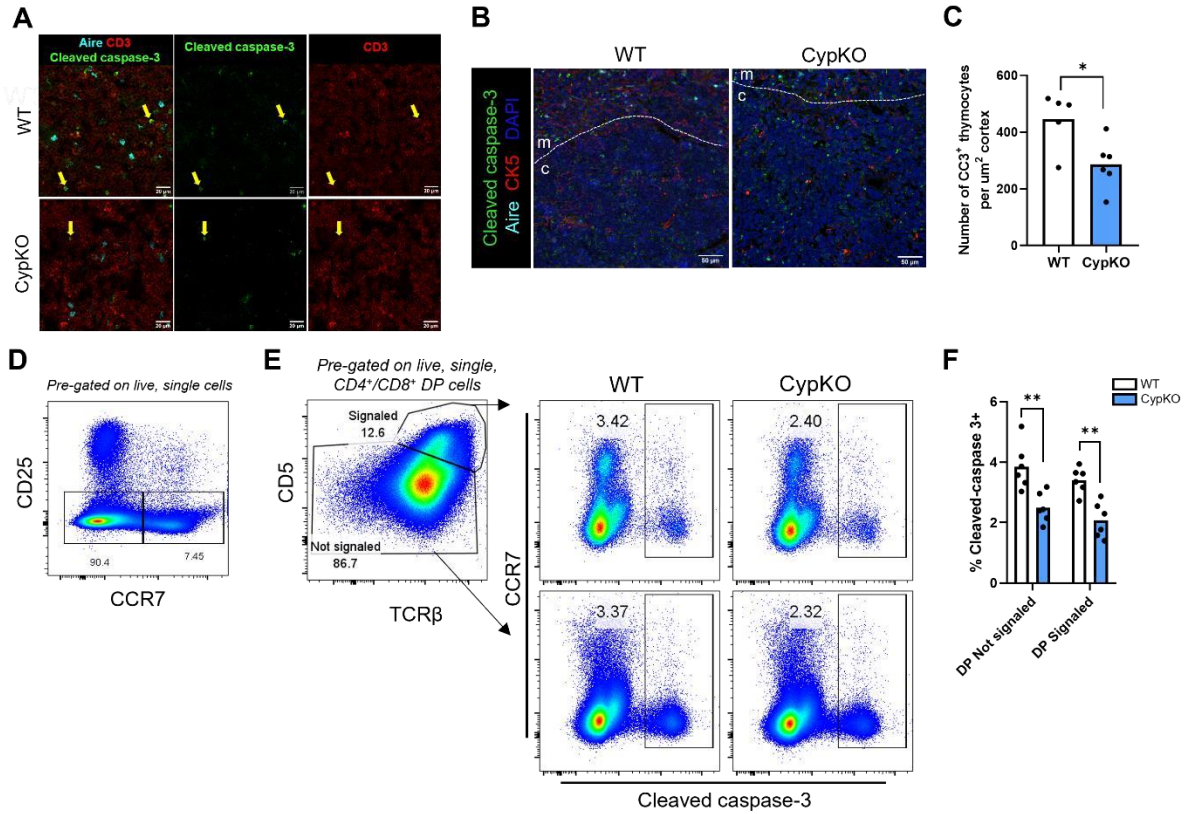

**fig S5. Decreased thymocyte apoptosis in Cyp27b1 KO mice** **A.** Thymic IF microscopy images showing co-staining of cleaved caspase 3 (small rings) with CD3<sup>+</sup> thymocytes. **B,C.** Representative IF microscopy images showing cleaved caspase 3 staining in the thymic cortex (Aire<sup>-</sup> regions)(B), and representative summary data (C) (c=cortex, m=medulla). **D.** Flow cytometry plot showing gating for CCR7<sup>+</sup> and CCR7<sup>-</sup> CD25<sup>-</sup> populations. **E.** Flow cytometric gating strategy for “signaled” (CD5<sup>+</sup> TCRβ<sup>hi</sup>) and “not signaled” (CD5<sup>-</sup>, TCRβ<sup>lo</sup>) DP thymocytes **F.** Summary of the frequency of cleaved caspase 3+ “signaled” and “not signaled” DP thymocytes in WT vs Cyp27b1 KO thymi. All experiments were performed with age-matched (male and female) 8-12-week old mice. Each dot represents an individual mouse. Statistics: Unpaired parametric T tests.  $p < 0.05$ \*,  $p < 0.01$ \*\* ,  $p < 0.001$ \*\*\*,  $p < 0.0001$ \*\*\*\*.

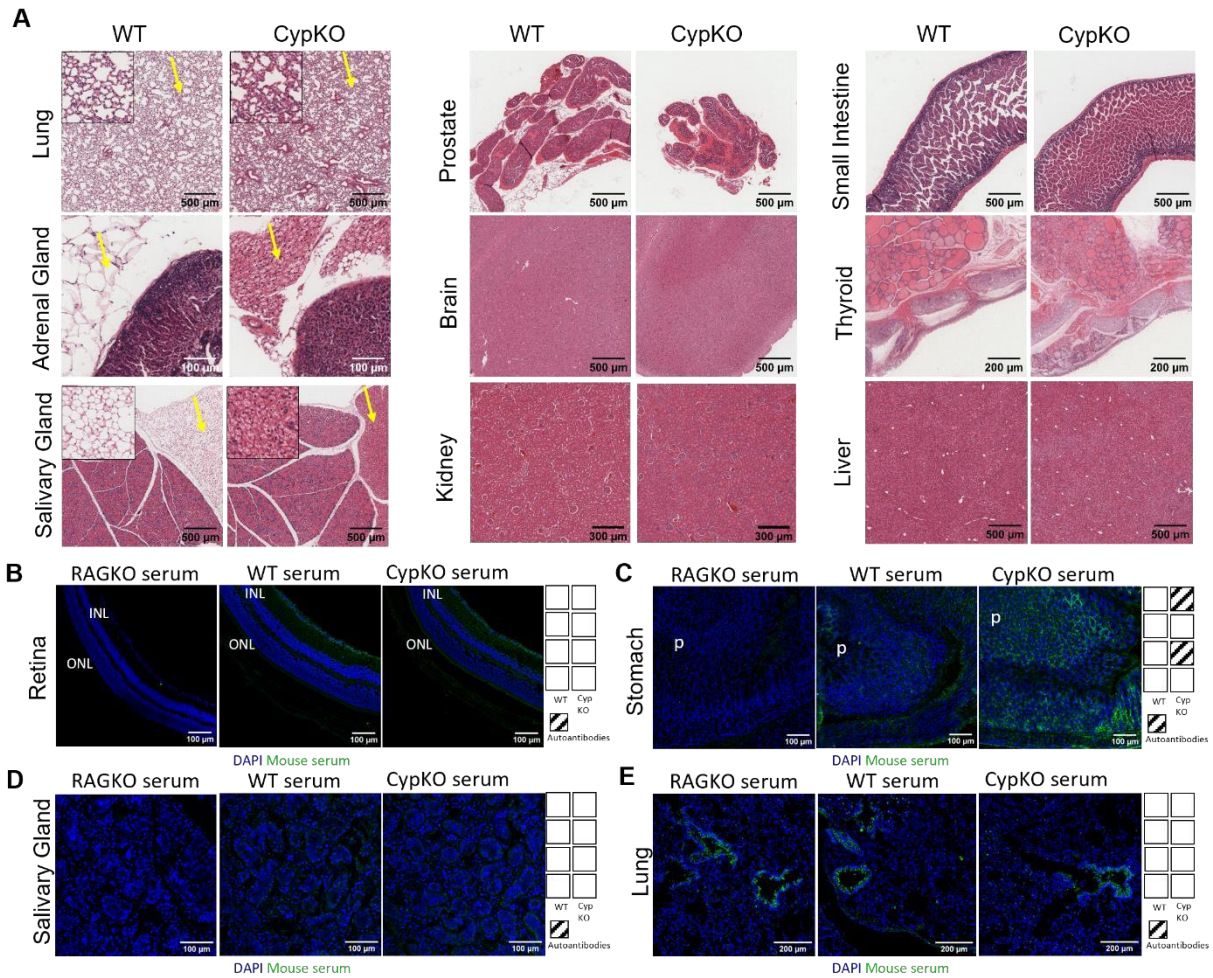

**fig. S6. Mild inflammation in several CypKO mouse tissues.** *A.* Representative H&E images of tissue from 26-week-old WT or CypKO mice (male). *B-E.* Representative confocal microscopy images of autoantibody staining of RagKO, WT, or CypKO serum samples on the indicated target organs and summary of phenotypic penetrance. Experiments were performed with male 26-week-old mice.

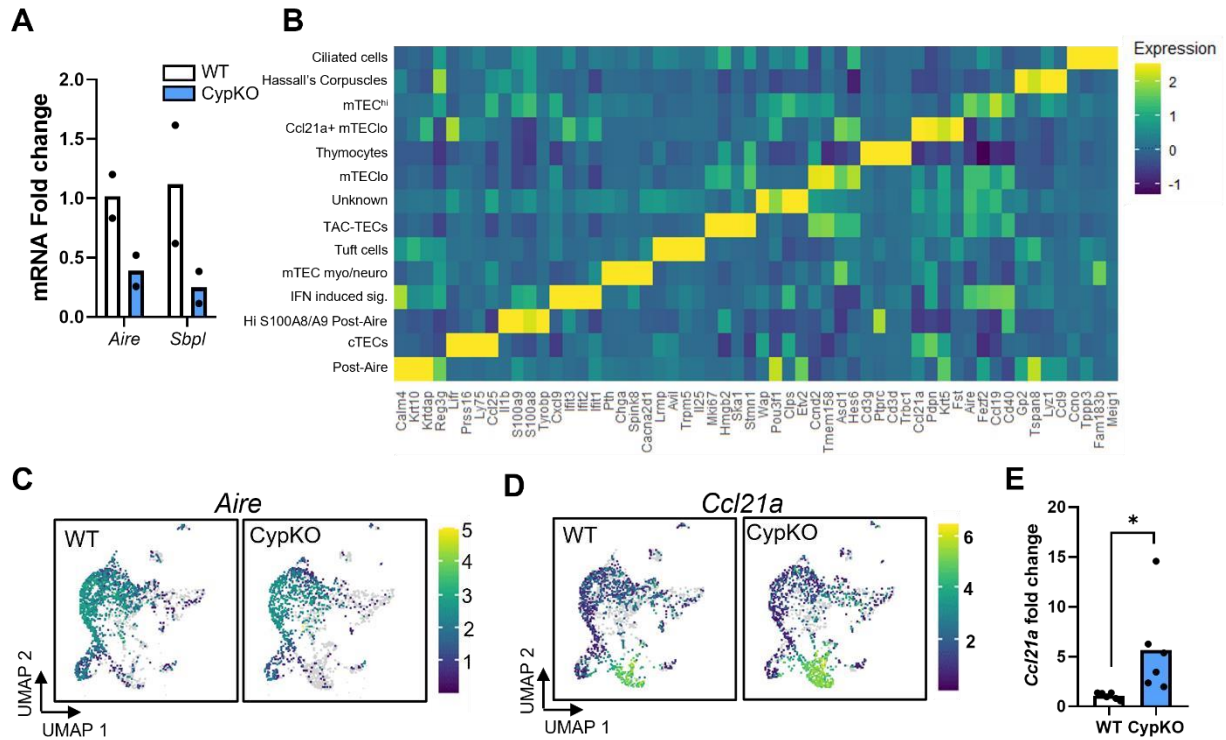

**fig S7. Divergent mTEC differentiation in CypKO mice** **A.** qPCR data from sequenced samples. **B.** Heatmap of 4 top 20 DEGs per cluster. **C.** UMAPs showing Aire expression in WT and KO samples. **D.** UMAPs showing Ccl21a expression in representative WT versus KO samples. **E.** qPCR validation of Ccl21a expression. Experiments in (E) were performed with age-matched (male and female) 8-12-week old mice. Each dot represents an individual mouse. Statistics: Unpaired parametric T tests.  $p < 0.05^*$ ,  $p < 0.01^{**}$ ,  $p < 0.001^{***}$ ,  $p < 0.0001^{****}$ .



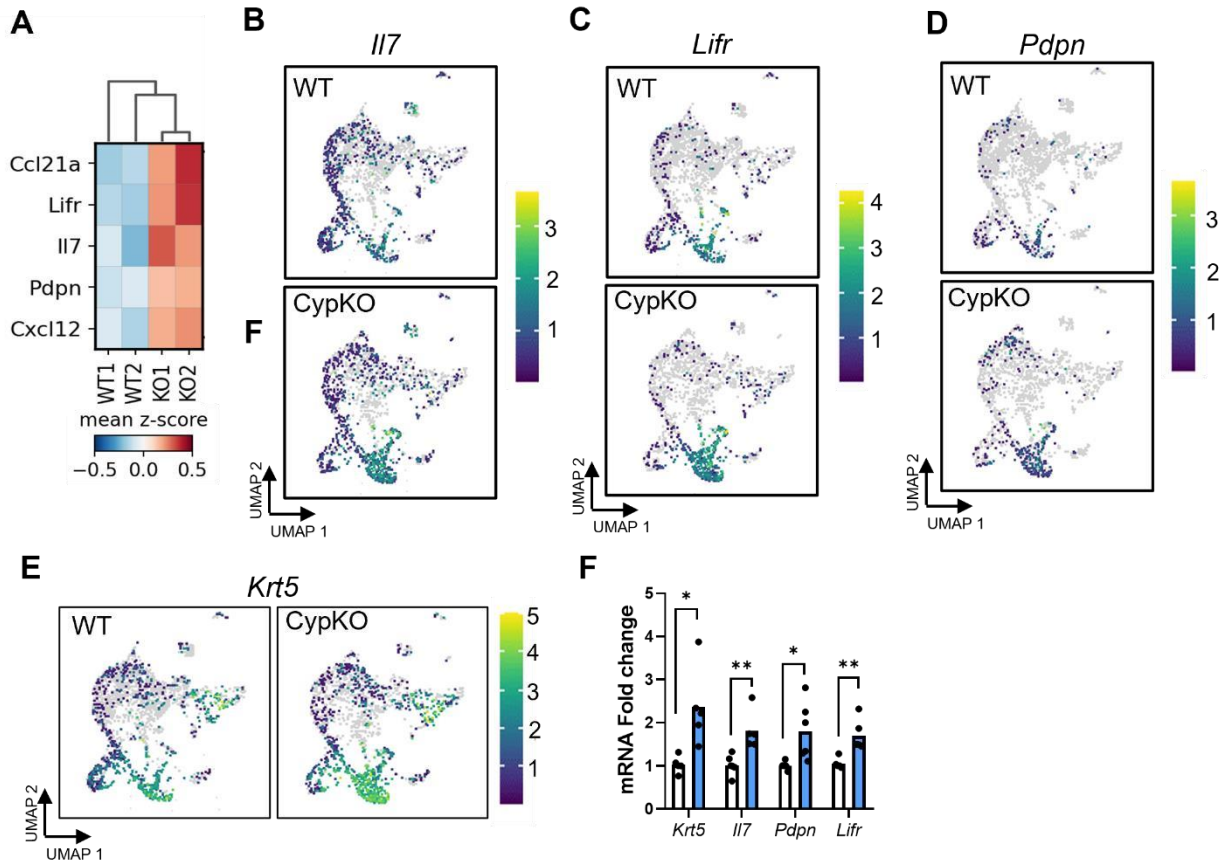

**fig S8. Increased “intertypical” TEC marker gene expression in CypKO mice** **A.** Matrixplot of jTEC genes in all sequenced samples. **B-D** UMAPs showing decreased expression of “intertypical” TEC markers, *Il7*, *Lifr*, *Pdpn*, in the *Ccl21a*<sup>+</sup> cluster. **E.** UMAP showing increased *Krt5* transcripts in KO *Ccl21a*<sup>+</sup> TECs. **F.** RT/qPCR validation of “intertypical” TEC marker genes. Experiments in (F) were performed with age-matched 8-12-week old (male and female) mice. Each dot represents an individual mouse. Statistics: Unpaired parametric T tests.  $p < 0.05$ \*,  $p < 0.01$ \*\*\*,  $p < 0.001$ \*\*\*,  $p < 0.0001$ \*\*\*\*.

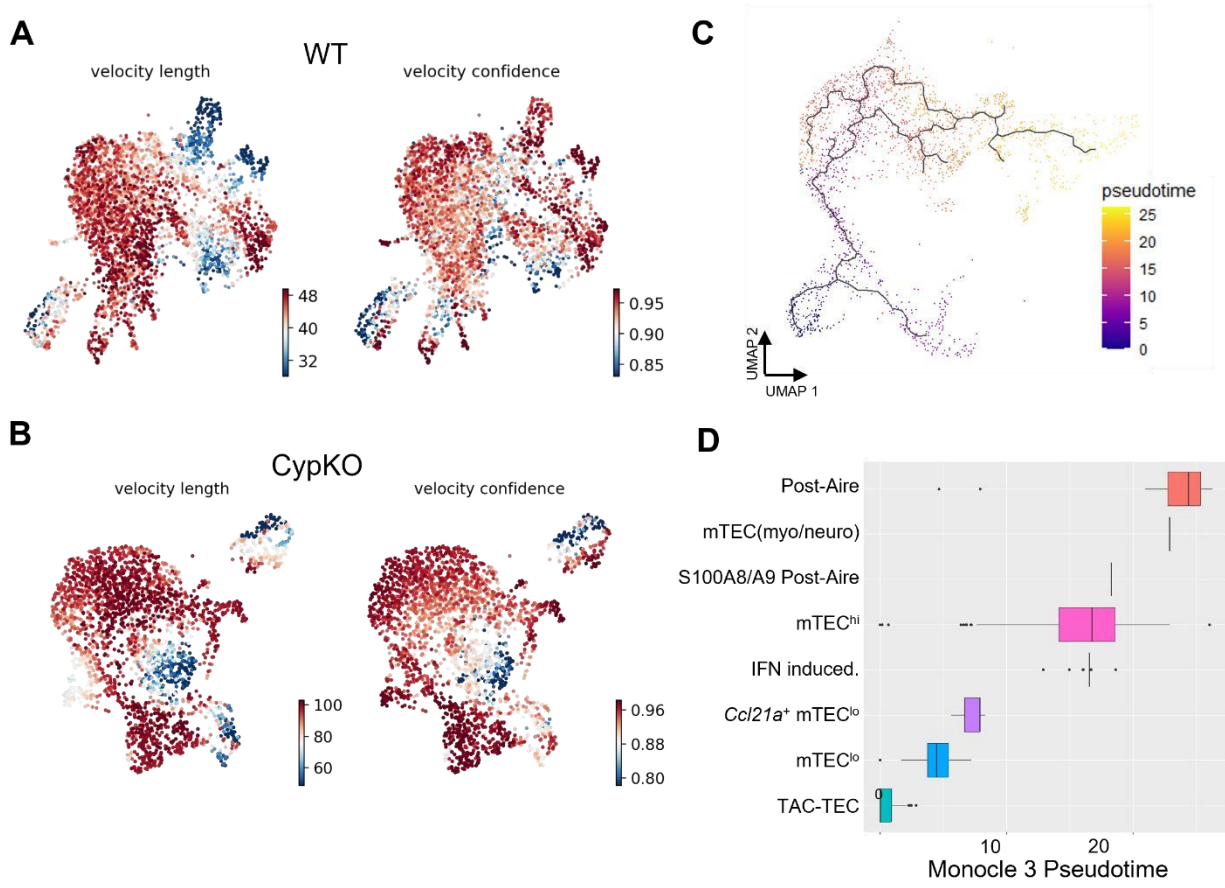

**fig S9. Trajectory analysis** **A.** Velocity length (left) and velocity confidence (right) for WT. **B.** Velocity length (left) and velocity confidence (right) for CypKO. **C.** Pseudotime projection of a representative WT TEC sample. **D.** Pseudotemporal ordering of TEC clusters in a WT sample.

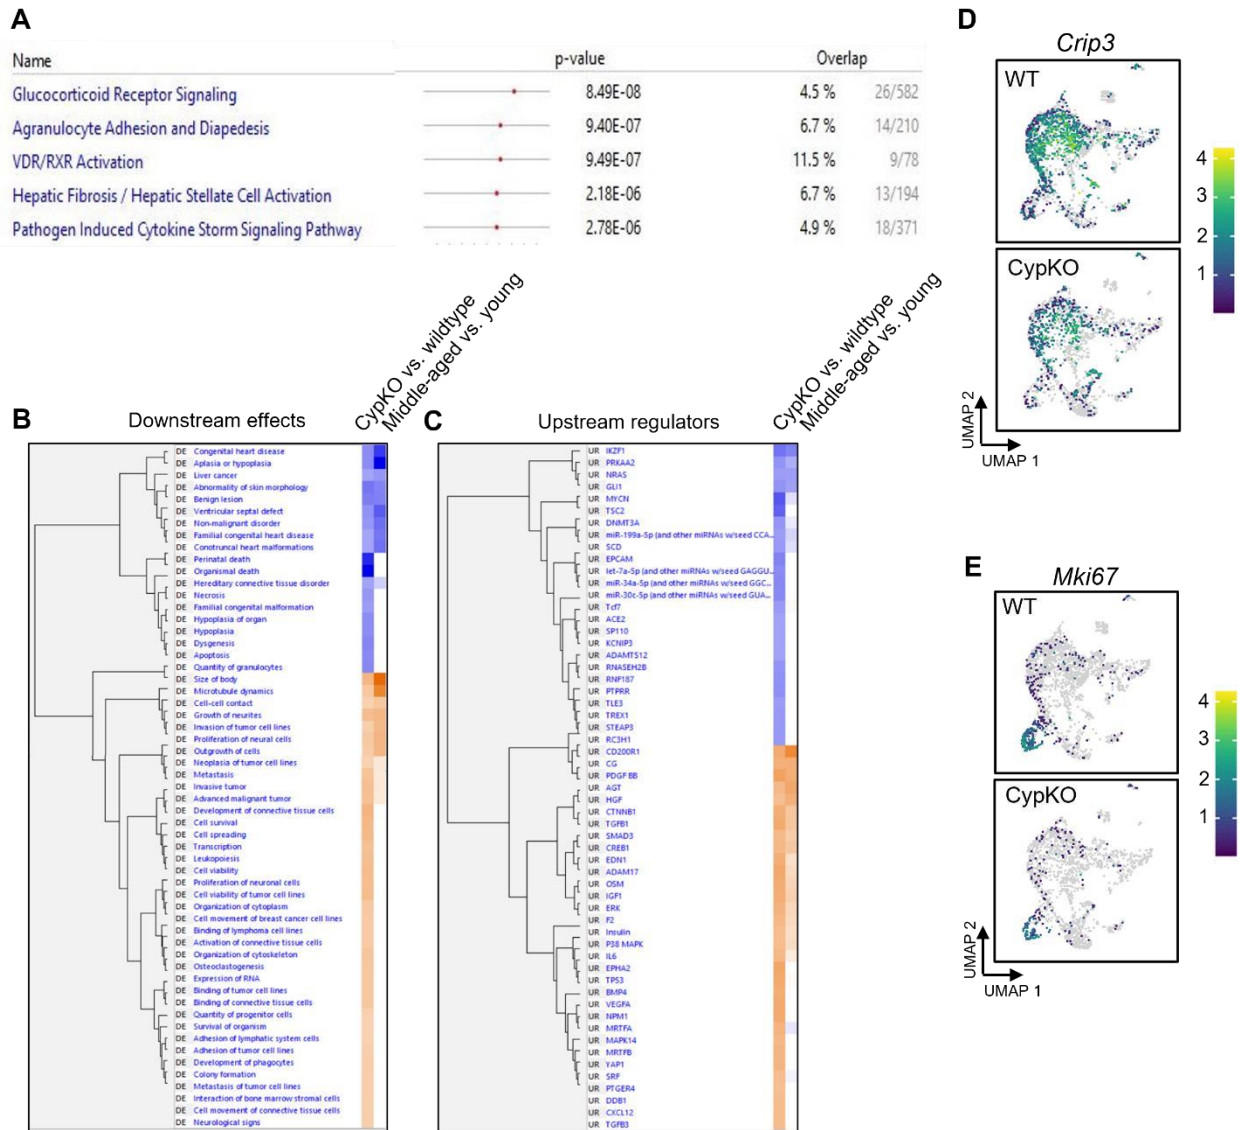

**fig S10. Enrichment of aging pathways in CypKO** **A.** Top canonical pathways in Cyp27b1 KO vs WT TECs. **B.** Comparison of downstream effects (Z-score 45.83%) between our dataset and a middle-aged mouse versus young mouse dataset. **C.** Comparison of upstream regulators (Z-score 51.30%) between our dataset and a middle-aged mouse versus young mouse dataset. **D.** Representative UMAPs of *Crip3* expression in WT and KO TECs. **E.** Representative UMAPs of *Mki67* expression in wildtype and KO TECs.

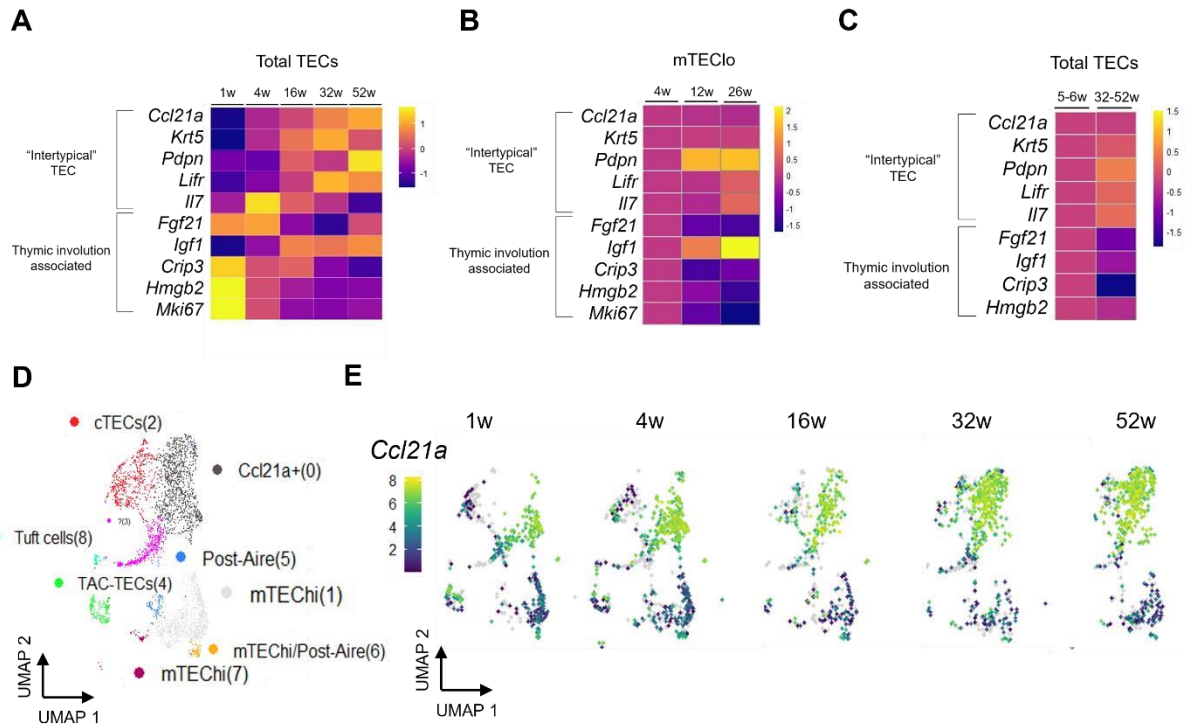

**fig S11. Enhanced “intertypical” TEC gene signature in aging thymi.** **A.** Average expression of “Intertypical” TEC and thymic involution-associated genes in TECs from 1-52-week-old mice. (Raw scRNA-seq data from Garan-Bale et al. eLife 2020 9:e56221) **B.** Fold change of “Intertypical” TEC and thymic involution associated genes in mTEC<sup>lo</sup> cells from 4-26-week-old mice. (Raw data by microarray from Ki S. et al. Cell Rep. 2014 Oct 9;9(1):402-415.) **C.** Fold change of “Intertypical” TEC and thymic involution-associated genes in TECs from 5-52-week-old mice. (Raw data by microarray from Lepletier A. et al. Cell Rep 2019 Jun 25;27(13):38873901.e4.) **D.** Cluster annotation of integrated scRNA-seq data from 1-52-week-old mouse TECs (Raw data from Garan-Bale et al. eLife 2020 9:e56221) **E.** UMAPs showing *Ccl21a* gene expression in TECs from 1–52-week-old mice. (Raw data from Garan-Bale et al. eLife 2020 9:e56221.)

table S1. List of differentially expressed genes by cluster.

| mTEC <sup>hi</sup> |            |             | Ccl21a <sup>+</sup> , mTEC <sup>lo</sup> |            |           |
|--------------------|------------|-------------|------------------------------------------|------------|-----------|
| Gene Name          | avg_log2FC | p_val_adj   | Gene Name                                | avg_log2FC | p_val_adj |
| Mt4                | 2.248      | 4.94E-213   | Ccl21a                                   | 4.253      | 0         |
| S100a8             | 2.080      | 8.96E-203   | ApoE                                     | 2.998      | 0         |
| Crhbp              | 1.997      | 0           | Ifi2712a                                 | 2.734      | 0         |
| Fabp6              | 1.969      | 1.11E-79    | Krt5                                     | 2.688      | 0         |
| Lypd8              | 1.942      | 2.81E-57    | Tagln                                    | 2.645      | 4.11E-250 |
| Pcp4               | 1.835      | 7.35E-61    | Ccl11                                    | 2.629      | 6.02E-158 |
| Obp2a              | 1.661      | 1.11E-205   | Mgp                                      | 2.473      | 0         |
| Sncg               | 1.648      | 4.52E-176   | Krt14                                    | 2.450      | 1.67E-303 |
| Pyy                | 1.635      | 1.03E-73    | Ctsl                                     | 2.325      | 0         |
| Defb19             | 1.631      | 2.60E-101   | Acta2                                    | 2.224      | 5.01E-105 |
| S100a9             | 1.559      | 1.49E-82    | Igfbp5                                   | 2.201      | 3.83E-230 |
| Crip1              | 1.557      | 2.46E-135   | Lifr                                     | 1.984      | 0         |
| Tbc1d4             | 1.557      | 0           | Socs3                                    | 1.978      | 1.09E-243 |
| S100a6             | 1.556      | 2.73E-137   | Id1                                      | 1.930      | 0         |
| AW112010           | 1.552      | 3.30E-121   | Gas1                                     | 1.898      | 0         |
| Ccl27a             | 1.547      | 3.96E-195   | Hpgd                                     | 1.864      | 1.96E-287 |
| Calca              | 1.542      | 3.33E-97    | Rbp1                                     | 1.681      | 9.30E-303 |
| Fgf21              | 1.528      | 3.07E-203   | Igfbp4                                   | 1.640      | 9.49E-235 |
| Pomc               | 1.437      | 5.98E-107   | Ascl1                                    | 1.639      | 4.29E-216 |
| Nts                | 1.434      | 6.41E-15    | Ly6a                                     | 1.488      | 8.29E-159 |
| Crabp1             | 1.404      | 3.62E-28    | Isg15                                    | 1.485      | 1.30E-182 |
| Csn2               | 1.397      | 2.41E-239   | Gpx3                                     | 1.477      | 4.27E-136 |
| Lgals2             | 1.389      | 1.18E-67    | Atf3                                     | 1.471      | 2.38E-85  |
| Calca              | 1.369      | 7.16E-110   | Fst                                      | 1.433      | 5.93E-254 |
| Gal                | 1.369      | 0.015902959 | Ifit3                                    | 1.407      | 1.99E-165 |
| ?                  |            |             | Post-Aire                                |            |           |
| Gene Name          | avg_log2FC | p_val_adj   | Gene Name                                | avg_log2FC | p_val_adj |
| Gm26917            | 2.48199085 | 9.91E-16    | Calm4                                    | 4.487      | 1.22E-176 |
| Wap                | 0.69027834 | 0.15482836  | Krt16                                    | 4.485      | 1.46E-201 |
| Lifr               | 0.66283792 | 1.24E-57    | Krt10                                    | 4.074      | 3.36E-209 |
| Fgl2               | 0.50693686 | 1           | Reg3g                                    | 3.955      | 1.68E-23  |
| Snhg11             | 0.48815608 | 0.28274831  | Sbsn                                     | 3.940      | 1.27E-222 |
| Mt2                | 0.48398488 | 1           | Wfdc2                                    | 3.927      | 6.95E-70  |
| Clps               | 0.48309626 | 1           | Dapl1                                    | 3.914      | 9.90E-239 |
| Ccl8               | 0.4821778  | 1.89E-13    | Lgals7                                   | 3.775      | 5.78E-160 |
| Cbr2               | 0.4261964  | 1.44E-08    | Krt16                                    | 3.773      | 2.39E-157 |
| Krt5               | 0.42305376 | 3.32E-08    | Crct1                                    | 3.506      | 2.83E-200 |
| Gm8113             | 0.3991534  | 0.03279093  | Dmkn                                     | 3.452      | 1.79E-212 |
| Tchh               | 0.36997676 | 4.50E-16    | Calml3                                   | 3.342      | 1.01E-197 |

|               |            |            |         |       |           |
|---------------|------------|------------|---------|-------|-----------|
| Etv2          | 0.34005012 | 5.85E-22   | Spink5  | 3.233 | 5.46E-155 |
| Pou3f1        | 0.33716992 | 1.45E-30   | Defb6   | 3.198 | 4.21E-140 |
| Ccl25         | 0.33624516 | 0.00364013 | Krt79   | 3.161 | 3.64E-173 |
| Rgs4          | 0.33450063 | 3.64E-10   | Scgb1a1 | 3.147 | 6.02E-19  |
| Jchain        | 0.33320809 | 2.58E-34   | Anxa1   | 3.143 | 1.66E-64  |
| Pds5b         | 0.32924118 | 0.11136192 | Ifitm1  | 3.070 | 2.27E-44  |
| Defb3         | 0.31870468 | 0.00181596 | Ltf     | 3.038 | 3.71E-59  |
| Igfbp5        | 0.31811168 | 1.29E-05   | Spink1  | 3.025 | 4.64E-10  |
| Ceacam10      | 0.31277888 | 3.63E-09   | Gsto1   | 2.971 | 1.45E-36  |
| Cd44          | 0.29337331 | 1.33E-17   | Ly6g6c  | 2.854 | 8.40E-157 |
| Fn1           | 0.29183855 | 8.00E-21   | Cnfn    | 2.841 | 5.24E-182 |
| F830016B08Rik | 0.2889918  | 1          | Gm94    | 2.805 | 2.29E-105 |
| Ccl21a        | 0.27555925 | 2.22E-16   | Spink5  | 2.796 | 7.91E-54  |

### mTEC<sup>lo</sup>

| Gene Name | avg_log2FC | p_val_adj |
|-----------|------------|-----------|
| Ccnd2     | 2.033      | 2.16E-173 |
| Tmem158   | 1.648      | 4.32E-116 |
| Ascl1     | 1.604      | 2.24E-144 |
| Hes6      | 1.513      | 2.73E-142 |
| Stmn1     | 1.237      | 1.71E-117 |
| Tubb5     | 1.135      | 2.01E-122 |
| Dut       | 1.074      | 1.81E-121 |
| Nkx6-2    | 1.065      | 1.00E-99  |
| Fgf21     | 0.955      | 8.44E-78  |
| Vim       | 0.924      | 6.37E-95  |
| H2afz     | 0.901      | 6.18E-67  |
| Hmgb2     | 0.853      | 1.41E-29  |
| Olfm4     | 0.771      | 3.90E-63  |
| Hist1h1b  | 0.763      | 3.51E-31  |
| Pclaf     | 0.739      | 1.94E-72  |
| Ttn       | 0.716      | 1.02E-58  |
| Hells     | 0.677      | 2.25E-30  |
| Hsp90aa1  | 0.665      | 1.93E-67  |
| Ltb       | 0.652      | 2.48E-76  |
| Cks1b     | 0.651      | 5.34E-99  |
| Wfdc18    | 0.635      | 5.70E-60  |
| Tuba1b    | 0.587      | 1.86E-43  |
| Rgs5      | 0.564      | 5.33E-56  |
| Tyms      | 0.528      | 1.01E-50  |
| Uhrf1     | 0.510      | 1.28E-51  |

### Tuft cells

| Gene Name | avg_log2FC | p_val_adj |
|-----------|------------|-----------|
| Lrmp      | 3.668      | 4.93E-123 |
| Gnat3     | 3.039      | 1.57E-56  |
| Plac8     | 2.942      | 9.21E-71  |
| Rgs13     | 2.937      | 6.22E-27  |
| Gng13     | 2.891      | 5.78E-66  |
| Avil      | 2.735      | 1.54E-78  |
| Plk2      | 2.538      | 8.37E-70  |
| Rgs2      | 2.522      | 1.46E-62  |
| Mctp1     | 2.498      | 2.20E-65  |
| Alox5ap   | 2.488      | 4.27E-43  |
| Gnb3      | 2.435      | 2.21E-21  |
| Fyb       | 2.333      | 2.13E-37  |
| Atp1a2    | 2.318      | 1.58E-70  |
| Trpm5     | 2.248      | 2.90E-44  |
| Atp2a3    | 2.239      | 2.04E-56  |
| Aldh2     | 2.189      | 9.67E-41  |
| Ptpn18    | 2.184      | 6.79E-40  |
| Bmx       | 2.126      | 4.98E-20  |
| Dclk1     | 2.123      | 9.47E-10  |
| Ahnak2    | 2.119      | 5.12E-53  |
| Ltc4s     | 2.097      | 6.54E-64  |
| Plcb2     | 2.041      | 3.06E-39  |
| Ly6g6f    | 1.981      | 6.86E-97  |
| Cd24a     | 1.924      | 2.12E-41  |
| Cited2    | 1.919      | 3.33E-39  |

### TAC-TECs

| Gene Name | avg_log2FC | p_val_adj |
|-----------|------------|-----------|
|-----------|------------|-----------|

### Hassall's corpuscles

| Gene Name | avg_log2FC | p_val_adj |
|-----------|------------|-----------|
|-----------|------------|-----------|

|           |       |           |               |          |           |
|-----------|-------|-----------|---------------|----------|-----------|
| Hmgb2     | 2.995 | 3.97E-200 | Serpinb6a     | 5.027104 | 1.28E-111 |
| Stmn1     | 2.586 | 3.65E-186 | Ccl20         | 4.753318 | 1.03E-81  |
| Hist1h1b  | 2.296 | 4.37E-134 | Pglyrp1       | 4.599647 | 2.99E-71  |
| Pclaf     | 2.252 | 5.95E-189 | Lyz1          | 4.331567 | 6.32E-54  |
| Tubb5     | 2.160 | 7.12E-173 | Ccl9          | 4.249893 | 2.18E-122 |
| Mki67     | 2.074 | 5.48E-189 | Ccl6          | 4.176278 | 9.17E-89  |
| Ube2c     | 2.031 | 1.54E-148 | Wfdc17        | 3.974778 | 1.04E-70  |
| H2afz     | 1.981 | 1.57E-180 | Serpinb1a     | 3.879944 | 2.26E-110 |
| Cdk1      | 1.966 | 1.47E-192 | Wfdc18        | 3.795423 | 7.01E-54  |
| Top2a     | 1.958 | 2.21E-152 | Hamp          | 3.647744 | 1.69E-53  |
| Cks2      | 1.897 | 7.40E-171 | Gp2           | 3.269319 | 4.05E-55  |
| Dut       | 1.837 | 1.07E-162 | 2200002D01Rik | 3.191545 | 2.55E-106 |
| Birc5     | 1.758 | 4.36E-199 | lapp          | 3.100513 | 3.57E-40  |
| Tuba1b    | 1.744 | 1.22E-140 | AW112010      | 3.014389 | 3.94E-84  |
| Cks1b     | 1.728 | 1.54E-185 | Cyp2a5        | 2.934383 | 4.58E-66  |
| Hist1h2ae | 1.632 | 3.60E-133 | Tnfaip2       | 2.900161 | 4.60E-44  |
| Cenpf     | 1.579 | 1.39E-138 | Clu           | 2.876343 | 4.81E-56  |
| Hist1h2ap | 1.523 | 7.11E-75  | Bcl2a1b       | 2.841082 | 7.48E-94  |
| Tpx2      | 1.512 | 5.12E-148 | Prg2          | 2.831532 | 1.13E-11  |
| Cdca8     | 1.490 | 2.18E-186 | H2-M2         | 2.793833 | 1.02E-57  |
| H2afx     | 1.474 | 4.71E-153 | Mmp7          | 2.785579 | 1.65E-64  |
| Tyms      | 1.447 | 1.33E-159 | Fxyd2         | 2.657434 | 2.48E-45  |
| Hmmr      | 1.417 | 4.66E-109 | Bcl2a1a       | 2.623822 | 1.26E-76  |
| Cdc20     | 1.412 | 3.63E-115 | Tnfrsf11b     | 2.572307 | 2.43E-61  |
| Nusap1    | 1.339 | 1.07E-164 | Reg3g         | 2.472904 | 9.93E-11  |

#### Thymocytes

| Gene Name | avg_log2FC  | p_val_adj |
|-----------|-------------|-----------|
| Trbc2     | 5.289937099 | 2.94E-111 |
| Cd3g      | 4.09051625  | 1.28E-114 |
| Trbc1     | 4.080953087 | 6.02E-69  |
| Satb1     | 3.939927275 | 4.63E-92  |
| Cd3d      | 3.821076309 | 1.01E-111 |
| Itm2a     | 3.617645267 | 5.05E-73  |
| Ptprc     | 3.563212201 | 1.20E-112 |
| Lef1      | 3.174798469 | 4.47E-66  |
| Rgs10     | 2.399626311 | 2.03E-51  |
| Ptpn18    | 2.276409979 | 7.53E-88  |
| Dusp5     | 2.012075433 | 3.16E-69  |
| Ccr7      | 1.92264816  | 3.69E-71  |
| Ms4a4b    | 1.871074859 | 6.02E-64  |
| Nr4a1     | 1.796812002 | 6.81E-86  |
| Hist1h1e  | 1.682397533 | 9.53E-29  |
| Ltb       | 1.637667745 | 9.72E-27  |

#### IFN inducible signature

| Gene Name | avg_log2FC | p_val_adj |
|-----------|------------|-----------|
| Cxcl9     | 2.702234   | 2.34E-24  |
| Ifit2     | 2.546196   | 2.16E-33  |
| Ifit3     | 2.523433   | 3.13E-31  |
| Isg15     | 1.986724   | 1.00E-26  |
| Cxcl10    | 1.971796   | 9.33E-28  |
| Krt71     | 1.888625   | 0.000161  |
| lapp      | 1.817474   | 7.41E-38  |
| Ifit1     | 1.809088   | 9.12E-35  |
| Igtp      | 1.725054   | 3.41E-51  |
| Ppy       | 1.608623   | 5.23E-48  |
| Rsad2     | 1.590612   | 2.39E-36  |
| Pyy       | 1.558592   | 8.62E-46  |
| Serpinb12 | 1.465139   | 2.43E-15  |
| Ripply2   | 1.437128   | 0.000581  |
| Irgm1     | 1.409331   | 1.69E-36  |
| Gbp4      | 1.37809    | 9.68E-42  |

|         |             |          |               |          |          |
|---------|-------------|----------|---------------|----------|----------|
| Dusp2   | 1.635942709 | 1.41E-35 | Psca          | 1.367316 | 2.66E-10 |
| Nkg7    | 1.580126901 | 3.67E-74 | Krt9          | 1.331516 | 0.536792 |
| Fyb     | 1.483633168 | 2.39E-49 | Ifit3b        | 1.301972 | 6.70E-39 |
| Klk8    | 1.44972444  | 1.06E-46 | ligp1         | 1.281621 | 2.15E-31 |
| Izumo1r | 1.446498726 | 7.89E-39 | F830016B08Rik | 1.269348 | 1.19E-45 |
| Rgs2    | 1.316672649 | 6.16E-17 | Gbp2          | 1.225642 | 0.395441 |
| Rgs1    | 1.22188448  | 2.11E-72 | Oasl1         | 1.159475 | 1.88E-48 |
| Il2rb   | 1.135570329 | 1.79E-75 | Ido1          | 1.117974 | 2.64E-38 |
| Vim     | 1.089528504 | 6.73E-29 | Ccl5          | 1.107096 | 8.38E-34 |

#### cTECs

| Gene Name | avg_log2FC | p_val_adj |
|-----------|------------|-----------|
| Prss16    | 5.058749   | 1.00E-82  |
| Ctsl      | 4.714356   | 1.10E-76  |
| Ccl25     | 4.200714   | 1.02E-74  |
| Cxcl12    | 4.12089    | 6.84E-82  |
| Tbata     | 3.811822   | 4.05E-76  |
| Fxyd2     | 3.538419   | 7.38E-64  |
| Psmb11    | 3.460467   | 5.64E-57  |
| Ly75      | 3.217974   | 9.16E-68  |
| Sym       | 2.970979   | 5.12E-60  |
| Isg20     | 2.630241   | 4.86E-47  |
| Snhg11    | 2.612262   | 1.86E-28  |
| Lifr      | 2.596734   | 5.68E-47  |
| Pltp      | 2.5237     | 3.42E-58  |
| Hpgd      | 2.246505   | 1.92E-42  |
| Cbr2      | 2.185294   | 4.64E-40  |
| Cd83      | 2.031487   | 1.53E-42  |
| S100a10   | 1.909181   | 3.91E-34  |
| Igfbp5    | 1.83543    | 5.30E-25  |
| Slc22a7   | 1.733237   | 4.48E-39  |
| Inmt      | 1.567906   | 0.036766  |
| Mgll      | 1.530225   | 2.02E-37  |
| Oat       | 1.523112   | 6.61E-31  |
| Oma1      | 1.445167   | 1.60E-13  |
| Crip3     | 1.429452   | 8.49E-24  |
| Nefm      | 1.324084   | 2.12E-42  |

#### mTEC myo/neuro (cluster 15, 18)

| Gene Name | avg_log2FC | p_val_adj |
|-----------|------------|-----------|
| Pth       | 8.983393   | 6.40E-41  |
| Chga      | 7.102812   | 1.52E-40  |
| Spink8    | 3.367312   | 5.52E-40  |
| Cacna2d1  | 3.15845    | 9.37E-52  |
| Rbp4      | 3.073776   | 8.74E-27  |
| Cryba2    | 2.940445   | 1         |
| Aqp5      | 2.906813   | 1.81E-38  |
| Mt3       | 2.883257   | 1         |
| Igfbp5    | 2.601551   | 4.51E-31  |
| Clca3b    | 2.601244   | 5.15E-10  |
| Cd177     | 2.580144   | 7.25E-19  |
| Chga      | 2.488321   | 1.01E-43  |
| Ascl1     | 2.471709   | 3.93E-33  |
| Mafb      | 2.325713   | 8.09E-10  |
| Cited2    | 2.231279   | 1.15E-28  |
| Scg2      | 2.09946    | 5.17E-29  |
| Car8      | 1.948816   | 1.07E-13  |
| Bex1      | 1.940322   | 7.18E-38  |
| Fbxo2     | 1.906263   | 1.17E-34  |
| Tspan1    | 1.852305   | 1.10E-37  |
| Fam183b   | 1.839199   | 2.04E-21  |
| Ceacam10  | 1.836163   | 1.69E-16  |
| Cd34      | 1.828835   | 0.238101  |
| Timp2     | 1.783631   | 3.30E-20  |
| Btg2      | 1.747824   | 1.69E-33  |

#### Ciliated cells

| Gene Name | avg_log2FC | p_val_adj |
|-----------|------------|-----------|
| Dynlrb2   | 3.153538   | 1.32E-44  |
| Tppp3     | 3.103299   | 3.07E-23  |
| Fam183b   | 3.094136   | 9.04E-38  |
| Hsp90aa1  | 3.034659   | 6.89E-37  |

#### Hi S100A8/A9 Post-Aire

| Gene Name | avg_log2FC | p_val_adj |
|-----------|------------|-----------|
| Il1b      | 4.797871   | 1.92E-37  |
| S100a9    | 4.583299   | 7.82E-05  |
| Tyrobp    | 4.185418   | 5.12E-38  |
| Retnlg    | 3.491873   | 8.02E-26  |



|               |          |          |         |          |          |
|---------------|----------|----------|---------|----------|----------|
| Meig1         | 2.942893 | 2.93E-35 | S100a8  | 3.219853 | 0.009796 |
| Mlf1          | 2.792293 | 1.02E-41 | Cxcl2   | 3.015568 | 2.32E-18 |
| 4933434E20Rik | 2.782433 | 1.08E-32 | Fcer1g  | 3.00803  | 1.28E-27 |
| Nudc          | 2.670647 | 8.05E-40 | Ccl17   | 2.895047 | 4.25E-20 |
| Tubb4b        | 2.639933 | 8.94E-35 | Cst3    | 2.719647 | 1.61E-17 |
| Lrrc23        | 2.621714 | 1.94E-37 | Ccl22   | 2.704525 | 3.46E-17 |
| Ccno          | 2.609096 | 8.12E-37 | Rgs1    | 2.517134 | 1.22E-26 |
| Rsph1         | 2.571079 | 1.71E-31 | G0s2    | 2.506569 | 1.33E-21 |
| Tmem107       | 2.544863 | 7.47E-31 | Lgals3  | 2.458862 | 1.10E-29 |
| Tekt1         | 2.49657  | 1.39E-40 | Lst1    | 2.452535 | 1.03E-31 |
| Cks2          | 2.423038 | 1.45E-35 | Samsn1  | 2.44638  | 5.97E-13 |
| Deup1         | 2.371027 | 2.46E-31 | Ptprc   | 2.42692  | 7.40E-39 |
| Vpreb3        | 2.332935 | 2.49E-23 | Gngt2   | 2.218463 | 1.36E-28 |
| Foxj1         | 2.324588 | 5.30E-38 | Spi1    | 2.17089  | 6.77E-24 |
| 1110004E09Rik | 2.315511 | 5.42E-40 | Ccr7    | 2.145469 | 4.85E-14 |
| Ly6c1         | 2.314051 | 2.66E-11 | Retnla  | 2.115833 | 2.56E-09 |
| 1700016K19Rik | 2.246011 | 1.66E-33 | Ccl2    | 2.112062 | 7.70E-28 |
| 4833427G06Rik | 2.24287  | 2.03E-16 | Cd14    | 2.041452 | 1.80E-14 |
| Ccdc34        | 2.233768 | 3.49E-30 | Bcl2a1b | 2.006279 | 4.98E-13 |
| Nme5          | 2.202569 | 3.86E-32 | Cd44    | 1.908584 | 1.31E-22 |
| 1110017D15Rik | 2.056407 | 9.52E-23 | Nr4a1   | 1.87598  | 3.92E-24 |
